# Supplementary material for: CO2 methanation over Ni–Al and Co–Al LDH-derived catalysts: the role of basicity
Source: Royal Society of Chemistry journal article supplement (doi:10.1039/d0se01059f), 2020-01-01
Supplement: d0se01059f1.pdf [file d0se01059f1.pdf]

**Supplementary material to “CO<sub>2</sub> methanation over Ni-Al and Co-Al LDH-derived catalysts: The role of basicity”**

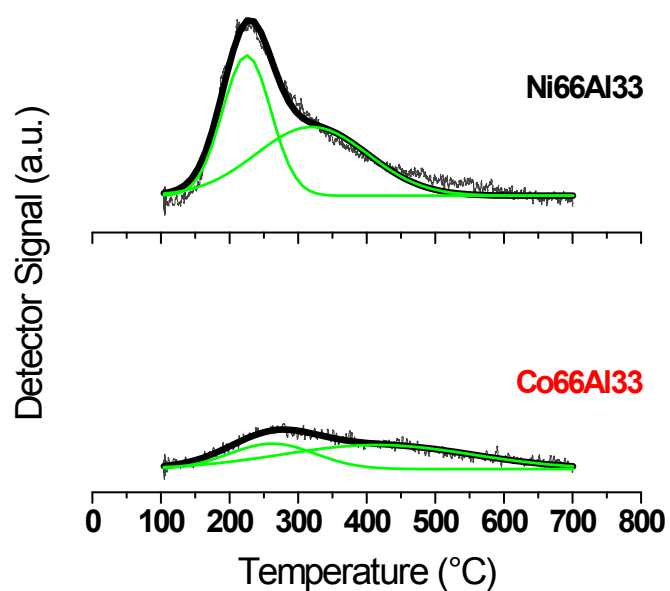

Figure S1. NH<sub>3</sub>-TPD curves for the different samples.

Table S1 – Deconvolution of NH<sub>3</sub>-TPD profiles for the samples.

| Catalyst | Temperature (°C)     |                      | Fraction of the total sites (%) |                    | Total area of acidic sites (a.u.) |
|----------|----------------------|----------------------|---------------------------------|--------------------|-----------------------------------|
|          | 1 <sup>st</sup> peak | 2 <sup>nd</sup> peak | Weak acids sites                | Medium acids sites |                                   |
| Ni66Al33 | 225                  | 320                  | 144<br>(46.9)                   | 162<br>(53.1)      | 306                               |
| Co66Al33 | 262                  | 415                  | 41<br>(32.8)                    | 85<br>(67.8)       | 126                               |

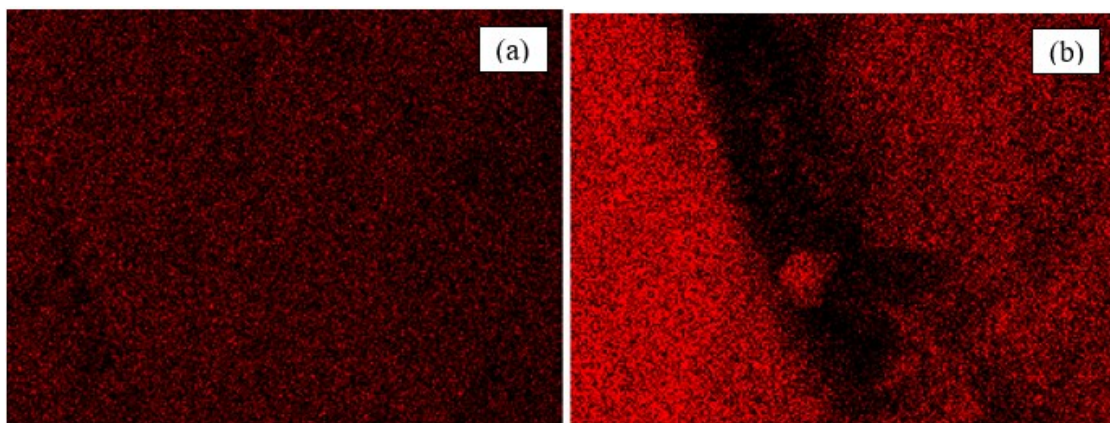

Figure S2. Al distribution by EDS mapping of catalysts after the stability reactions, where: (a) Ni<sub>66</sub>Al<sub>33</sub> and (b) Co<sub>66</sub>Al<sub>33</sub>.
